# Supplementary material for: Visual Adaptations for Mate Detection in the Male Carpenter Bee Xylocopa tenuiscapa
Source: PLoS One. 2017 Jan 20;12(1):e0168452. doi: 10.1371/journal.pone.0168452 (PMC5249068; doi:10.1371/journal.pone.0168452)
Supplement: S1 Table — (XLSX) [file pone.0168452.s001.xlsx]

## Sheet: Sheet1
stone throwing experiment Xylocopa tenuiscapa
						one female flying in 20m distance from male perching on metal rod on roof:
frontal/dorsal/caudal						30		20000	0.0015	0.0859436
date and position						mle reacted and flew circling up
2007-01-01
27th	size		visual	visual
	stone (mm)	closest dist (mm)	angle rad	angle degree	reaction
	30	6100	0.00491799	0.28178	0	no reaction
	34	3500	0.00971398	0.55657	1	responded
	38	4200	0.00904737	0.518376	1
	33	4200	0.00785698	0.450172	1
	36	3000	0.0119994	0.687516	1
28th perch 3/4
	9	1200	0.00749986	0.42971	0
	9	500	0.0179981	1.03121	0
	12	1000	0.0119994	0.687516	1
	14	300	0.0466328	2.67186	1
	12	1500	0.00799983	0.458356	1
	13	1500	0.00866645	0.496551	0
	10	1000	0.00999967	0.572939	0
	11	1500	0.0073332	0.420162	0
	13	1500	0.00866645	0.496551	1
	10	300	0.033321	1.90915	0
	18	800	0.0224962	1.28894	1
	21.5	1000	0.0214967	1.23167	1
30th tree position (perch 5)
	16	500	0.0319891	1.83284	0
	18	2000	0.00899976	0.515648	0
	18	1500	0.0119994	0.687516	1
	22.5	1500	0.0149989	0.859372	1
	22	1500	0.0146656	0.840278	1
	19	600	0.0316561	1.81376	1
	22	500	0.0439716	2.51939	1
	19.5	1044.03	0.0186754	1.07002	1
fence 5 30th 1st
	17	1500	0.0113328	0.649324	1
	23	1500	0.0153321	0.878466	1
	16.5	1900	0.00868399	0.497556	1
	18.5	2500	0.00739986	0.423981	1
	21	3000	0.00699989	0.401064	1
	21.5	3500	0.00614278	0.351955	0
	21	4500	0.00466663	0.267378	1
	18	3500	0.00514281	0.294661	0
	20	3500	0.00571422	0.327401	0
	21	3000	0.00699989	0.401064	0
	13	2000	0.00649991	0.372417	0
	16	500	0.0319891	1.83284	1
	20	2800	0.00714274	0.409249	1
	20	4100	0.00487801	0.279489	1
	15	4500	0.00333332	0.190985	1
	16	1500	0.0106663	0.611132	1
	18	2500	0.00719988	0.412522	0
	16	2400	0.00666657	0.381966	1
	15	2000	0.00749986	0.42971	1
	14	2300	0.00608688	0.348753	0
	20	4800	0.00416664	0.238731	1
	16	4500	0.00355554	0.203717	0
	17	4800	0.00354165	0.202922	0
	18	5300	0.00339621	0.194589	1
	19	4000	0.00474996	0.272153	0
	17	4000	0.00424997	0.243506	0
	17	1300	0.0130762	0.74921	1
	14	2800	0.00499996	0.286477	0
	20	4100	0.00487801	0.279489	1
	22	3600	0.00611104	0.350137	0
	21	3600	0.00583327	0.334222	0
	20	4800	0.00416664	0.238731	1
	19.5	5000	0.00389998	0.223452	0
	20	4000	0.00499996	0.286477	1
	24	5500	0.00436361	0.250016	1
	22	4200	0.00523805	0.300118	1
	21	1500	0.0139991	0.802089	1
	20	3500	0.00571422	0.327401	1
	20	3500	0.00571422	0.327401	1
	19	4000	0.00474996	0.272153	1
	31st jan07
	data from perch 6 (on the fence), head angle between + and - 20°					behind the tree thing / y
	stone	distance	angle rad	angle degree		height included in distance / h
	17	4600	0.00369564	0.211744	1
	27	1300	0.0207662	1.18982	1
	15	2500	0.00599993	0.343771	0	y
	15	3000	0.00499996	0.286477	0	y
	13.5	3000	0.00449997	0.257829	0	y
	17	3500	0.0048571	0.278292	0	y
	13	1000	0.0129993	0.744803	0	y
	19	300	0.0632489	3.62389	1	y
	14	2400	0.00583327	0.334222	0	y
	17	1500	0.0113328	0.649324	0	y
	19	1600	0.0118744	0.680355	0	y
	22	2000	0.0109996	0.630228	0	y
	21	1500	0.0139991	0.802089	0	y
	30	1600	0.0187478	1.07417	0	y
	23	1300	0.0176905	1.01359	1	angled
	25	3800	0.00657885	0.37694	1
	23	5100	0.00450977	0.258391	1
	27	1044.03	0.0258555	1.48141	1	h
	16	4200	0.00380951	0.218269	0	y
	14	4500	0.0031111	0.178253	0	y
	18	3026.55	0.0059473	0.340755	1	h	-3026.55
	22	3800	0.00578941	0.331709	1
	24	4500	0.00533328	0.305575	1
	18	2500	0.00719988	0.412522	0		-2500
	18	1500	0.0119994	0.687516	1		-1500
	13.5	2700	0.00499996	0.286477	0
	14.5	1700	0.0085292	0.488687	0	y
	14.5	3000	0.0048333	0.276927	0
	12.5	3000	0.00416664	0.238731	0
	14.5	2500	0.00579993	0.332312	0
	14	2500	0.00559994	0.320853	0
	13	3200	0.00406248	0.232763	0	y
	15	1100	0.0136355	0.781258	0
	18	3026.55	0.0059473	0.340755	1	h
	20	4300	0.00465113	0.26649	1
	15	2500	0.00599993	0.343771	0
	15	4000	0.00374998	0.214858	0
	13	5000	0.00259999	0.148969	0
	13.5	3000	0.00449997	0.257829	0
	15	4500	0.00333332	0.190985	0
	13	4000	0.00324999	0.186211	0
	13	3500	0.00371427	0.212812	0
	14	2000	0.00699989	0.401064	1
	13	1000	0.0129993	0.744803	0
	12	1300	0.00923051	0.528869	0
	23	2500	0.00919974	0.527106	1
	14	3014.96	0.00464347	0.266051	0	h, y	-3014.96
	15	3059.41	0.00490286	0.280913	1	h, y
	12	3026.55	0.00396489	0.227172	0	h, y
	12	1414.21	0.00848508	0.486159	1	y
	14	3400	0.00411762	0.235922	1	y
	13.5	4000	0.00337499	0.193373	0	y
	13.5	3000	0.00449997	0.257829	0	y
	11	2000	0.00549994	0.315124	0	y
	13	2300	0.00565211	0.323842	0	y
	15	1000	0.0149989	0.859372	1
	14	3000	0.00466663	0.267378	0
	14	2500	0.00559994	0.320853	1
	30	3800	0.00789457	0.452326	1
	13	2000	0.00649991	0.372417	0
	15	1500	0.00999967	0.572939	0
	17	500	0.0339869	1.94731	0
	22	500	0.0439716	2.51939	1	h
	17	2600	0.00653837	0.374621	0
	16	800	0.0199973	1.14576	0
	14	1800	0.00777762	0.445625	0
	13	360.555	0.0360399	2.06493	0	h, y
	14	2154.07	0.00649925	0.372379	0	h, y
	12	2002.5	0.00599244	0.343342	1	h, y	-2002.5
	13.5	2022.37	0.00667522	0.382462	0	h, y
	12	2022.37	0.00593355	0.339967	0	h, y	-2022.37
	14	2022.37	0.00692244	0.396627	0	h, y	-2022.37
	14	2061.55	0.00679089	0.38909	0	h, y
	15	1077.03	0.0139263	0.797915	1	h, y
	20	2200	0.00909066	0.520856	1
	13	1414.21	0.00919213	0.52667	0	h
	12	1000	0.0119994	0.687516	1
	perch position 5, head angle between ±20 °, all stones thrown posterior to male							x different male
	31	2800	0.011071	0.63432	1		-2800
	28.5	2500	0.0113995	0.653144	1		-2500
	28.5	1000	0.0284923	1.63249	1		-1000
	25	5000	0.00499996	0.286477	0	low?	-5000
	24	4500	0.00533328	0.305575	1		-4500
	17	4600	0.00369564	0.211744	1		-4600
	15	4000	0.00374998	0.214858	0		-4000
	14	3500	0.00399998	0.229182	0		-3500
	15	1800	0.00833314	0.477454	1		-1800
	15	3000	0.00499996	0.286477	0		-3000
	16	4000	0.00399998	0.229182	0		-4000
	25	4000	0.00624992	0.358094	1		-4000
	29	5000	0.00579993	0.332312	1	white!	-5000
	28	5500	0.00509087	0.291685	0		-5500
	24	4000	0.00599993	0.343771	1		-4000
	16	2800	0.00571422	0.327401	1		-2800
	20	4000	0.00499996	0.286477	0	x	-4000
	23.5	4300	0.00546506	0.313125	0	x	-4300
	25	2000	0.0124993	0.71616	0	x	-2000
	23.5	2500	0.00939972	0.538564	1	x	-2500
	26	3000	0.00866645	0.496551	0	x	-3000
	26	1500	0.0173316	0.993027	1	x	-1500
	24	1800	0.0133325	0.763898	1	x	-1800
	21.5	3200	0.00671865	0.38495	0	low	-3200
	22	2800	0.00785698	0.450172	1		-2800
	22	3500	0.00628563	0.36014	0		-3500
	23.5	4000	0.00587493	0.336609	1		-4000
	23	5000	0.00459997	0.263559	0		-5000
	20	4800	0.00416664	0.238731	0		-4800
	18	4000	0.00449997	0.257829	0		-4000
	19	2500	0.00759985	0.43544	1		-2500
	17	2800	0.00607135	0.347863	0		-2800
	21	4000	0.00524995	0.3008	1		-4000
	24	3800	0.00631571	0.361863	1		-3800
	20	4200	0.00476187	0.272835	0		-4200
	18	3000	0.00599993	0.343771	0		-3000
	17	3000	0.00566661	0.324673	0		-3000
	14	2000	0.00699989	0.401064	0		-3000
	14	1800	0.00777762	0.445625	1		-1800
	23.5	4800	0.00489579	0.280508	0		-4800
	23	4000	0.00574994	0.329447	1		-4000
	27	4800	0.00562494	0.322285	1		-4800
	25	5000	0.00499996	0.286477	0	low	-5000
	22	5000	0.00439997	0.2521	1		-5000
	20	5500	0.00363635	0.208347	0		-5500
	24	4800	0.00499996	0.286477	1		-4800
	24	4000	0.00599993	0.343771	0		-4000
	24	3500	0.00685704	0.392879	0		-3500
	25	3800	0.00657885	0.37694	1		-3800
	21	4200	0.00499996	0.286477	0		-4200
	21	3200	0.00656241	0.375998	1		-3200
	26	4500	0.00577771	0.331039	1		-4500
	20	4000	0.00499996	0.286477	1		-4000
	29	4500	0.00644436	0.369234	0		-4500
	30	3000	0.00999967	0.572939	1		-3000
	24	4400	0.00545449	0.312519	1		-4400
	25	5500	0.00454542	0.260434	0		-5500
	30	6000	0.00499996	0.286477	0		-6000
	22	6000	0.00366665	0.210084	0		-6000
	19	5000	0.00379998	0.217723	0		-5000
	22	5000	0.00439997	0.2521	0		-5000
	23	800	0.0287421	1.6468	0		-800
	20	1414	0.0141433	0.810353	1	h	-1414
	28	1800	0.0155543	0.891196	1		-1800
	26	2200	0.0118176	0.6771	0	low	-2200
	22	2800	0.00785698	0.450172	1		-2800
	26	3500	0.00742843	0.425618	1		-3500
	24	1500	0.0159986	0.916654	0		-1500
	32	1044.03	0.0306408	1.75559	1	h	-1044.03
	26	707.107	0.036753	2.10579	1	h	-707.107
	20	1500	0.0133325	0.763898	0		-1500
	21	2000	0.0104996	0.601584	0	low	-2000
	23	3800	0.00605256	0.346786	0		-3800
	20	4200	0.00476187	0.272835	0		-4200
	25	3000	0.00833314	0.477454	1		-3000
	14	1118.03	0.0125213	0.717419	0	h	-1118.03
	25	2200	0.0113631	0.65106	0		-2200
	27	2000	0.0134992	0.773446	0		-2000
	21	1700	0.0123523	0.707735	1		-1700

## Sheet: Sheet2
male black bee, stone frontal (±20°), horizontal or <45°above horizon)							male black bee, stone dorsal (within 45° from the vertical above head						male black bee, stone caudal, (±20°), horizontal or <45°above horizon)
	visual angle stone	reaction
31st fence	0.211744	1	0.1	0.285714	0.148969	0	31st fence	1.48141	1				31st fence	0.412522	0	0.2	0.185185	0.200534	1	0.040214
	1.18982	1	7		0.178253	0		0.340755	1					0.687516	1	27		0.208347	0
	0.343771	0	2		0.186211	0		0.340755	1				31st tree	0.63432	1	5		0.210084	0
	0.286477	0	5		0.190985	0		0.266051	0					0.653144	1	22		0.211744	1
	0.257829	0			0.191	1		0.280913	1					1.63249	1			0.214858	0
	0.278292	0			0.193373	0		0.227172	0					0.305575	1			0.217723	0
	0.744803	0			0.195	1		0.52667	0					0.211744	1			0.229182	0
	3.62389	1	0.2	0.375	0.203	0	31st tree	0.810353	1					0.214858	0			0.229182	0
	0.334222	0	32		0.204	0		1.75559	1					0.229182	0			0.238731	0
	0.649324	0	12		0.211744	1		2.10579	1					0.477454	1			0.2521	1
	0.680355	0	20		0.212812	0		0.717419	0					0.286477	0			0.2521	0
	0.630228	0			0.214858	0	30th tree	1.07002	1					0.229182	0			0.253658	0
	0.802089	0			0.218269	0	02/02 tree	0.333507	1					0.358094	1			0.257829	0
	1.07417	0			0.223	0		2.35408	0					0.332312	1			0.260434	0
	1.01359	1			0.232763	0		2.22362	0					0.291685	0			0.262717	0
	0.37694	1			0.235922	1		5.52144	1					0.343771	1			0.263559	0
	0.258391	1			0.238731	0		1.73038	1					0.327401	1			0.267378	0
	0.218269	0			0.239	1		1.78991	1					0.286477	0			0.272835	0
	0.178253	0			0.239	1		0.699169	0					0.313125	0			0.272835	0
	0.331709	1			0.244	0		0.838911	0					0.71616	0			0.280508	0
	0.305575	1			0.25	1		1.21735	1					0.538564	1			0.286477	0
	0.286477	0			0.257829	0								0.496551	0			0.286477	0
	0.488687	0			0.257829	0								0.993027	1			0.286477	1
	0.276927	0			0.257829	0								0.763898	1			0.286477	0
	0.238731	0			0.258391	1								0.450172	1			0.286477	1
	0.332312	0			0.26649	1								0.36014	0			0.286477	0
	0.320853	0			0.267	1								0.336609	1			0.291685	0
	0.232763	0			0.267378	0								0.263559	0	0.3	0.6	0.3008	1
	0.781258	0			0.272	0								0.238731	0	25		0.305575	1
	0.26649	1			0.272	1								0.257829	0	15		0.312519	1
	0.343771	0			0.276927	0								0.43544	1	10		0.313125	0
	0.214858	0			0.278292	0								0.347863	0			0.322285	1
	0.148969	0			0.28	1								0.3008	1			0.324673	0
	0.257829	0			0.28	1								0.361863	1			0.327401	1
	0.190985	0			0.286477	0								0.272835	0			0.329447	1
	0.186211	0			0.286477	0								0.343771	0			0.331039	1
	0.212812	0			0.287	0								0.324673	0			0.332312	1
	0.401064	1			0.287	1								0.401064	0			0.336609	1
	0.744803	0			0.295	0								0.445625	1			0.343771	1
	0.528869	0	0.3	0.310345	0.3	1								0.280508	0			0.343771	1
	0.527106	1	29		0.305575	1								0.329447	1			0.343771	0
	0.486159	1	9		0.315124	0								0.322285	1			0.343771	0
	0.235922	1	20		0.320853	0								0.2521	1			0.346786	0
	0.193373	0			0.320853	1								0.208347	0			0.347863	0
	0.257829	0			0.323842	0								0.286477	1			0.358094	1
	0.315124	0			0.327	0								0.343771	0			0.36014	0
	0.323842	0			0.327	1								0.392879	0			0.361863	1
	0.859372	1			0.327	1								0.37694	1			0.369234	0
	0.267378	0			0.331709	1								0.286477	0			0.375998	1
	0.320853	1			0.332312	0								0.375998	1			0.37694	1
	0.452326	1			0.334	0								0.331039	1			0.378147	0
	0.372417	0			0.334222	0								0.286477	1			0.392879	0
	0.572939	0			0.339967	0								0.369234	0	0.4		0.401064	0
	1.94731	0			0.343342	1								0.572939	1			0.412522	0
	2.51939	1			0.343771	0								0.312519	1			0.425618	1
	0.374621	0			0.343771	0								0.260434	0			0.43544	1
	1.14576	0			0.349	0								0.286477	0			0.441987	1
	0.445625	0			0.35	0								0.210084	0			0.445625	1
	2.06493	0			0.352	0								0.217723	0			0.450172	1
	0.372379	0			0.372	0								0.2521	0			0.450172	1
	0.343342	1			0.372379	0								1.6468	0			0.477454	1
	0.382462	0			0.372417	0								0.891196	1			0.477454	1
	0.339967	0			0.374621	0								0.450172	1			0.496551	0
	0.396627	0			0.37694	1								0.425618	1			0.515648	1
	0.38909	0			0.382	1								0.916654	0			0.538564	1
	0.797915	1			0.382462	0								0.763898	0			0.572939	1
	0.520856	1			0.38909	0								0.346786	0			0.63432	1
	0.687516	1	0.4	0.5625	0.396627	0								0.272835	0			0.638347	1
30th tree	1.83284	0	16		0.401	1								0.477454	1			0.65106	0
	0.515648	0	9		0.401	0								0.65106	0			0.653144	1
	0.687516	1	7		0.401064	1								0.773446	0			0.658872	1
	0.859372	1			0.401064	1								0.707735	1			0.687516	1
	0.840278	1			0.409	1							02/02 tree	0.515648	1			0.707735	1
	1.81376	1			0.413	0								1.03121	1			0.71616	0
	2.51939	1			0.420162	0								1.24121	1			0.725708	0
30th fence	0.649	1			0.424	1								1.56222	1			0.732073	0
	0.879	1			0.42971	0								0.658872	1			0.763898	1
	0.498	1			0.43	1								0.441987	1			0.763898	0
	0.424	1			0.445625	0								0.343771	1			0.773446	0
	0.401	1			0.452326	1								0.200534	1			0.891196	1
	0.352	0			0.458356	1								0.267378	0			0.916654	0
	0.267	1			0.486159	1								0.378147	0			0.993027	1
	0.295	0			0.488687	0								0.262717	0			1.03121	1
	0.327	0	0.5	0.454545	0.496551	0								0.253658	0			1.11774	1
	0.401	0	11		0.496551	1								0.725708	0			1.24121	1
	0.372	0	5		0.498	1								0.638347	1			1.54661	1
	1.834	1	6		0.515648	0								0.732073	0			1.56222	1
	0.409	1			0.520856	1								1.54661	1			1.63249	1
	0.28	1			0.527106	1								2.67186	1			1.6468	0
	0.191	1			0.528869	0								1.11774	1			2.67186	1
	0.611	1			0.572939	0
	0.413	0			0.572939	0
	0.382	1	0.6	0.538462	0.611	1
	0.43	1	13		0.630228	0
	0.349	0	7		0.649	1
	0.239	1	6		0.649324	0
	0.204	0			0.680355	0
	0.203	0			0.687516	1
	0.195	1			0.687516	1
	0.272	0			0.687516	1
	0.244	0			0.744803	0
	0.749	1			0.744803	0
	0.287	0			0.749	1
	0.28	1			0.763898	1
	0.35	0			0.781258	0
	0.334	0	0.8	0.75	0.797915	1
	0.239	1	8		0.802	1
	0.223	0	6		0.802089	0
	0.287	1	2		0.806904	0
	0.25	1			0.840278	1
	0.3	1			0.859372	1
	0.802	1			0.859372	1
	0.327	1			0.879	1
	0.327	1	1	0.588235	1.01359	1
	0.272	1	17		1.03121	0
28th perch 3	0.42971	0	10		1.07417	0
	1.03121	0	7		1.14576	0
	0.687516	1			1.18982	1
	2.67186	1			1.23167	1
	0.458356	1			1.28894	1
	0.496551	0			1.81376	1
	0.572939	0			1.83284	0
	0.420162	0			1.834	1
	0.496551	1			1.90915	0
	1.90915	0			1.94731	0
	1.28894	1			2.06493	0
	1.23167	1			2.51939	1
02/02 tree+fence	0.401064	1			2.51939	1
	0.806904	0			2.67186	1
	0.763898	1			3.62389	1
